# Supplementary material
Source: Springer Nature journal article supplement (https://www.springermedizin.de/resource/supplementary/13601_2011_258_MOESM2_ESM.pdf/9677280)

# Bavi

**Nasal Blocking**  
31.0%

5.7%

0.7%

1.0%

7.3%

17.7%

**Allergic Rhinitis**  
10.0%

1.0%

13.4%

**Runny Nose**  
39.4%

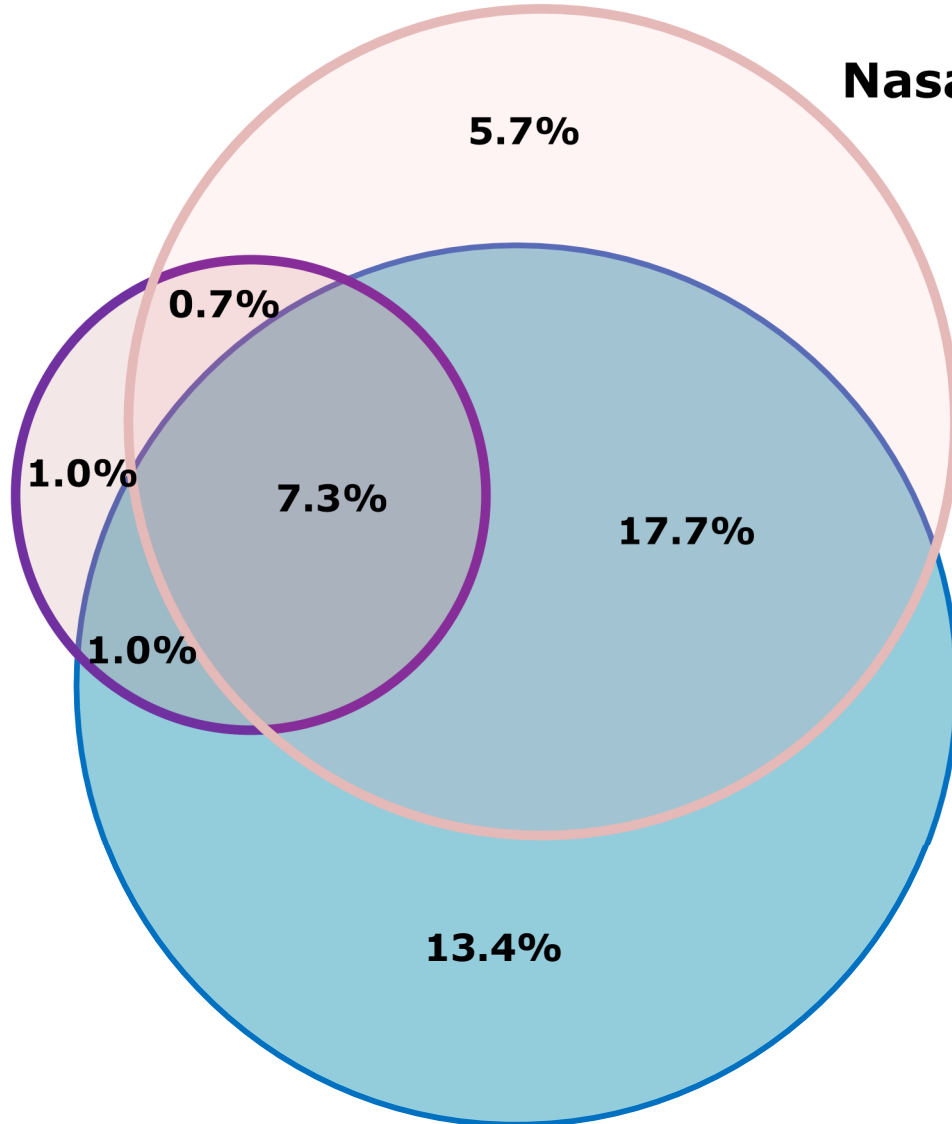

Supplement: MOESM2 [file 9677280]
